# Supplementary material for: Diffuse Optical Characterization of the Healthy Human Thyroid Tissue and Two Pathological Case Studies
Source: PubMed Central journal article supplement (PMC4731400; doi:10.1371/journal.pone.0147851), 2016-01-27
Supplement: pone.0147851.s001.pdf [file pone.0147851.s001.pdf]

Table 1: S1 Table. Muscle location data.

| ID           | $\mu_a, 690$ [ $\text{cm}^{-1}$ ] | $\mu_a, 785$ [ $\text{cm}^{-1}$ ] | $\mu_a, 830$ [ $\text{cm}^{-1}$ ] | $\mu_{s, 690}$ | $\mu_{s, 785}$ | $\mu_{s, 830}$ | THC [ $\mu\text{M}$ ] | StO <sub>2</sub> [%] | BFI [ $\text{cm}^2/\text{s}$ ] $\times 10^{-9}$ |
|--------------|-----------------------------------|-----------------------------------|-----------------------------------|----------------|----------------|----------------|-----------------------|----------------------|-------------------------------------------------|
|              | <b>25 mm</b>                      |                                   |                                   |                |                |                |                       |                      |                                                 |
| 1            | 0.25 ± 0.01                       | 0.24 ± 0.01                       | 0.27 ± 0.01                       | 9.8 ± 0.2      | 9.0 ± 0.2      | 7.9 ± 0.2      | 119.6 ± 3.9           | 66.7 ± 1.4           | 10.7 ± 1.9                                      |
| 2            | 0.24 ± 0.01                       | 0.20 ± 0.01                       | 0.22 ± 0.01                       | 9.0 ± 0.3      | 8.1 ± 0.2      | 7.4 ± 0.2      | 97.8 ± 3.0            | 57.9 ± 2.1           | 7.3 ± 1.4                                       |
| 3            | 0.24 ± 0.01                       | 0.22 ± 0.01                       | 0.24 ± 0.01                       | 9.0 ± 0.6      | 8.2 ± 0.5      | 7.1 ± 0.4      | 109.5 ± 3.3           | 63.7 ± 1.9           | 7.1 ± 0.6                                       |
| 4            | 0.23 ± 0.01                       | 0.21 ± 0.01                       | 0.24 ± 0.01                       | 9.0 ± 0.2      | 8.2 ± 0.1      | 7.6 ± 0.3      | 104.9 ± 5.3           | 64.8 ± 1.6           | 8.2 ± 1.0                                       |
| 5            | 0.22 ± 0.01                       | 0.22 ± 0.01                       | 0.24 ± 0.02                       | 10.1 ± 0.2     | 9.1 ± 0.2      | 8.1 ± 0.2      | 107.1 ± 6.9           | 66.8 ± 1.9           | 13.4 ± 3.0                                      |
| 6            | 0.22 ± 0.02                       | 0.23 ± 0.01                       | 0.26 ± 0.01                       | 8.8 ± 0.2      | 7.5 ± 0.2      | 6.7 ± 0.3      | 115.9 ± 5.1           | 70.0 ± 2.7           | 11.0 ± 1.3                                      |
| 7            | 0.19 ± 0.01                       | 0.19 ± 0.01                       | 0.20 ± 0.01                       | 10.0 ± 0.2     | 9.4 ± 0.2      | 8.3 ± 0.2      | 88.4 ± 3.3            | 64.0 ± 1.4           | 5.8 ± 0.8                                       |
| 8            | 0.31 ± 0.03                       | 0.26 ± 0.01                       | 0.29 ± 0.01                       | 7.9 ± 0.4      | 6.5 ± 0.3      | 5.8 ± 0.2      | 131.8 ± 5.4           | 60.4 ± 2.9           | 13.8 ± 2.3                                      |
| 9            | 0.21 ± 0.01                       | 0.19 ± 0.01                       | 0.21 ± 0.01                       | 9.8 ± 0.3      | 8.6 ± 0.3      | 7.7 ± 0.2      | 92.7 ± 3.4            | 63.5 ± 1.2           | 11.2 ± 1.7                                      |
| 10           | 0.20 ± 0.01                       | 0.19 ± 0.01                       | 0.22 ± 0.01                       | 7.4 ± 0.1      | 6.2 ± 0.1      | 5.7 ± 0.1      | 94.3 ± 2.0            | 66.6 ± 1.2           | 9.8 ± 1.5                                       |
| 11           | 0.18 ± 0.01                       | 0.17 ± 0.01                       | 0.19 ± 0.01                       | 8.7 ± 0.2      | 7.5 ± 0.1      | 6.9 ± 0.2      | 80.2 ± 2.5            | 63.6 ± 1.9           | 6.0 ± 0.7                                       |
| 12           | 0.27 ± 0.01                       | 0.26 ± 0.01                       | 0.28 ± 0.01                       | 11.5 ± 0.6     | 10.3 ± 0.5     | 9.6 ± 0.5      | 127.0 ± 3.2           | 64.7 ± 1.7           | 4.8 ± 1.1                                       |
| 13           | 0.23 ± 0.01                       | 0.20 ± 0.01                       | 0.22 ± 0.01                       | 8.8 ± 0.1      | 7.3 ± 0.1      | 6.8 ± 0.1      | 97.9 ± 3.3            | 61.3 ± 1.8           | 9.2 ± 2.8                                       |
| 14           | 0.17 ± 0.01                       | 0.17 ± 0.01                       | 0.19 ± 0.01                       | 8.7 ± 0.2      | 7.7 ± 0.2      | 7.1 ± 0.2      | 80.4 ± 2.8            | 66.8 ± 2.2           | 8.6 ± 1.5                                       |
| 15           | 0.26 ± 0.01                       | 0.23 ± 0.01                       | 0.26 ± 0.01                       | 8.0 ± 0.1      | 7.2 ± 0.1      | 6.4 ± 0.1      | 115.2 ± 1.9           | 62.6 ± 1.2           | 6.6 ± 2.1                                       |
| 16           | 0.17 ± 0.01                       | 0.19 ± 0.01                       | 0.21 ± 0.01                       | 8.4 ± 0.2      | 8.0 ± 0.2      | 7.1 ± 0.2      | 92.1 ± 6.6            | 70.8 ± 1.5           | 5.6 ± 1.2                                       |
| 17           | 0.20 ± 0.01                       | 0.20 ± 0.01                       | 0.22 ± 0.01                       | 9.4 ± 0.1      | 8.2 ± 0.1      | 7.6 ± 0.1      | 98.6 ± 1.4            | 67.3 ± 2.1           | 7.0 ± 2.0                                       |
| 18           | 0.20 ± 0.01                       | 0.18 ± 0.01                       | 0.21 ± 0.01                       | 8.9 ± 0.1      | 7.7 ± 0.1      | 7.3 ± 0.1      | 90.1 ± 3.1            | 62.6 ± 1.9           | 5.7 ± 0.6                                       |
| 19           | 0.23 ± 0.01                       | 0.21 ± 0.01                       | 0.23 ± 0.01                       | 9.3 ± 0.3      | 8.2 ± 0.2      | 7.8 ± 0.2      | 104.0 ± 5.7           | 64.4 ± 1.6           | 4.3 ± 0.6                                       |
| 20           | 0.26 ± 0.01                       | 0.24 ± 0.01                       | 0.29 ± 0.01                       | 8.9 ± 0.1      | 7.6 ± 0.1      | 7.5 ± 0.1      | 126.6 ± 3.0           | 67.6 ± 1.1           | 4.3 ± 0.4                                       |
| 21           | 0.21 ± 0.01                       | 0.19 ± 0.01                       | 0.21 ± 0.01                       | 9.1 ± 0.2      | 8.1 ± 0.1      | 7.5 ± 0.1      | 94.0 ± 3.0            | 62.9 ± 1.4           | 5.9 ± 1.3                                       |
| 22           | 0.19 ± 0.01                       | 0.19 ± 0.01                       | 0.21 ± 0.01                       | 9.8 ± 0.1      | 8.8 ± 0.1      | 8.1 ± 0.2      | 93.2 ± 3.4            | 67.7 ± 1.4           | 7.9 ± 1.6                                       |
| <b>13 mm</b> |                                   |                                   |                                   |                |                |                |                       |                      |                                                 |
| 3            | 0.21 ± 0.01                       | 0.20 ± 0.01                       | 0.20 ± 0.01                       | 10.10 ± 1.2    | 9.5 ± 1.1      | 7.6 ± 1        | 92.3 ± 3.4            | 60.9 ± 2.3           | 9.4 ± 1.5                                       |
| 13           | 0.23 ± 0.01                       | 0.21 ± 0.01                       | 0.21 ± 0.01                       | 13.20 ± 0.3    | 11.0 ± 0.2     | 9.9 ± 0.2      | 97.3 ± 4.5            | 60.0 ± 1.9           | 8.5 ± 3.2                                       |
| 14           | 0.17 ± 0.01                       | 0.17 ± 0.01                       | 0.18 ± 0.01                       | 11.60 ± 0.2    | 10.1 ± 0.2     | 9.4 ± 0.2      | 77.8 ± 2.4            | 64.7 ± 2.9           | 7.8 ± 1.6                                       |
| 15           | 0.25 ± 0.01                       | 0.23 ± 0.01                       | 0.23 ± 0.01                       | 10.60 ± 0.6    | 9.9 ± 0.5      | 8.1 ± 0.5      | 108.6 ± 2.7           | 60.4 ± 1.9           | 8.3 ± 2.7                                       |
| 16           | 0.16 ± 0.01                       | 0.18 ± 0.01                       | 0.19 ± 0.01                       | 8.90 ± 0.2     | 8.9 ± 0.1      | 7.3 ± 0.2      | 84.9 ± 6.5            | 70.3 ± 1.0           | 5.6 ± 0.8                                       |
| 17           | 0.18 ± 0.01                       | 0.17 ± 0.01                       | 0.20 ± 0.01                       | 10.90 ± 0.1    | 9.1 ± 0.2      | 8.8 ± 0.1      | 85.5 ± 1.9            | 65.4 ± 2.3           | 13.6 ± 1.9                                      |
| 18           | 0.19 ± 0.01                       | 0.17 ± 0.01                       | 0.19 ± 0.01                       | 11.70 ± 0.3    | 9.6 ± 0.3      | 9.4 ± 0.3      | 81.7 ± 2.8            | 60.9 ± 2.6           | 7.3 ± 1.7                                       |
| 19           | 0.22 ± 0.01                       | 0.19 ± 0.01                       | 0.21 ± 0.01                       | 12.40 ± 0.4    | 10.5 ± 0.3     | 10.4 ± 0.2     | 93.6 ± 4.4            | 61.5 ± 2.4           | 8.2 ± 1.4                                       |
| 20           | 0.26 ± 0.01                       | 0.24 ± 0.01                       | 0.27 ± 0.01                       | 12.80 ± 0.3    | 10.5 ± 0.2     | 10.4 ± 0.2     | 122.2 ± 3.5           | 64.9 ± 1.1           | 8.6 ± 1.0                                       |
| 21           | 0.20 ± 0.01                       | 0.18 ± 0.01                       | 0.19 ± 0.01                       | 11.20 ± 0.3    | 9.7 ± 0.3      | 8.9 ± 0.3      | 83.6 ± 3.4            | 60.1 ± 2.4           | 7.5 ± 1.1                                       |
| 22           | 0.21 ± 0.01                       | 0.21 ± 0.01                       | 0.22 ± 0.01                       | 12.90 ± 0.4    | 11.1 ± 0.3     | 10.2 ± 0.3     | 99.9 ± 5.3            | 66.4 ± 1.1           | 8.7 ± 1.7                                       |

Means and standard deviations recorded with a source detector separation of 25 mm for the entire healthy population (n = 22) and one of 13 mm for a subset (n = 11) of the study population. Shown are the absorption coefficients  $\mu_a$  and reduced scattering coefficients  $\mu_s'$  per wavelength as well as total hemoglobin concentrations (THC), oxygen saturations (StO<sub>2</sub>) and blood flow indices (BFI).
