# Supplementary material for: Diffuse Optical Characterization of the Healthy Human Thyroid Tissue and Two Pathological Case Studies
Source: PubMed Central journal article supplement (PMC4731400; doi:10.1371/journal.pone.0147851), 2016-01-27
Supplement: pone.0147851.s002.pdf [file pone.0147851.s002.pdf]

Table 1: **S2 Table. Gland location 1 data.**

| ID           | $\mu_a, 690$ [ $\text{cm}^{-1}$ ] | $\mu_a, 785$ [ $\text{cm}^{-1}$ ] | $\mu_a, 830$ [ $\text{cm}^{-1}$ ] | $\mu_s, 690$ | $\mu_s, 785$ | $\mu_s, 830$ | THC [ $\mu\text{M}$ ] | StO <sub>2</sub> [%] | BFI [ $\text{cm}^2/\text{s}$ ] $\times 10^{-9}$ |
|--------------|-----------------------------------|-----------------------------------|-----------------------------------|--------------|--------------|--------------|-----------------------|----------------------|-------------------------------------------------|
|              | <b>25 mm</b>                      |                                   |                                   |              |              |              |                       |                      |                                                 |
| 1            | 0.24 ± 0.01                       | 0.22 ± 0.01                       | 0.23 ± 0.01                       | 10.4 ± 0.2   | 9.8 ± 0.2    | 8.4 ± 0.3    | 104.2 ± 4.5           | 61.0 ± 2.0           | 9.4 ± 2.0                                       |
| 2            | 0.31 ± 0.01                       | 0.29 ± 0.01                       | 0.34 ± 0.02                       | 9.9 ± 0.4    | 8.7 ± 0.2    | 8.3 ± 0.4    | 153.6 ± 4.7           | 68.5 ± 2.4           | 22.5 ± 5.6                                      |
| 3            | 0.27 ± 0.01                       | 0.25 ± 0.01                       | 0.27 ± 0.02                       | 9.2 ± 0.4    | 8.3 ± 0.4    | 7.2 ± 0.3    | 122.1 ± 8.3           | 63.9 ± 1.8           | 12.2 ± 2.3                                      |
| 4            | 0.29 ± 0.02                       | 0.29 ± 0.01                       | 0.34 ± 0.02                       | 10.0 ± 0.3   | 9.4 ± 0.1    | 9.0 ± 0.4    | 152.9 ± 5.5           | 70.6 ± 2.9           | 16.5 ± 2.1                                      |
| 5            | 0.31 ± 0.01                       | 0.30 ± 0.01                       | 0.33 ± 0.01                       | 8.3 ± 0.3    | 6.9 ± 0.4    | 6.2 ± 0.3    | 150.4 ± 2.5           | 66.5 ± 1.6           | 15.1 ± 3.1                                      |
| 6            | 0.31 ± 0.02                       | 0.31 ± 0.01                       | 0.37 ± 0.03                       | 8.3 ± 0.3    | 6.7 ± 0.2    | 6.6 ± 0.4    | 164.1 ± 6.6           | 73.7 ± 3.2           | 22.8 ± 2.7                                      |
| 7            | 0.16 ± 0.01                       | 0.17 ± 0.01                       | 0.17 ± 0.01                       | 10.5 ± 0.2   | 10.2 ± 0.2   | 9.2 ± 0.2    | 76.8 ± 4.6            | 64.8 ± 1.6           | 7.33 ± 2.0                                      |
| 8            | 0.33 ± 0.01                       | 0.30 ± 0.01                       | 0.34 ± 0.01                       | 8.8 ± 0.4    | 7.2 ± 0.4    | 6.5 ± 0.4    | 154.2 ± 3.6           | 65.3 ± 1.9           | 22.3 ± 6.1                                      |
| 9            | 0.33 ± 0.01                       | 0.31 ± 0.01                       | 0.34 ± 0.01                       | 10.2 ± 0.3   | 8.7 ± 0.2    | 8.0 ± 0.4    | 156.0 ± 4.2           | 65.8 ± 2.2           | 26.0 ± 5.6                                      |
| 10           | 0.34 ± 0.02                       | 0.32 ± 0.02                       | 0.37 ± 0.03                       | 7.4 ± 0.3    | 6.0 ± 0.1    | 5.8 ± 0.2    | 167.6 ± 13.0          | 68.0 ± 2.2           | 19.4 ± 2.6                                      |
| 11           | 0.27 ± 0.01                       | 0.26 ± 0.01                       | 0.31 ± 0.01                       | 8.1 ± 0.7    | 6.7 ± 0.8    | 6.5 ± 0.8    | 135.7 ± 5.2           | 68.4 ± 2.6           | 11.7 ± 2.4                                      |
| 12           | 0.30 ± 0.02                       | 0.26 ± 0.02                       | 0.31 ± 0.03                       | 7.2 ± 0.1    | 5.7 ± 0.1    | 5.7 ± 0.1    | 138.0 ± 11.7          | 65.1 ± 2.7           | 17.7 ± 3.3                                      |
| 13           | 0.36 ± 0.01                       | 0.31 ± 0.01                       | 0.36 ± 0.03                       | 8.5 ± 0.2    | 6.5 ± 0.1    | 6.4 ± 0.3    | 163.7 ± 10.4          | 63.3 ± 3.6           | 13.9 ± 2.0                                      |
| 14           | 0.27 ± 0.01                       | 0.28 ± 0.01                       | 0.33 ± 0.01                       | 8.5 ± 0.3    | 7.1 ± 0.2    | 6.9 ± 0.3    | 145.0 ± 3             | 71.6 ± 1.4           | 13.2 ± 1.9                                      |
| 15           | 0.34 ± 0.01                       | 0.31 ± 0.01                       | 0.35 ± 0.02                       | 8.4 ± 0.3    | 7.4 ± 0.1    | 6.6 ± 0.2    | 161.6 ± 5.9           | 65.9 ± 2.1           | 14.1 ± 2.6                                      |
| 16           | 0.23 ± 0.01                       | 0.25 ± 0.01                       | 0.27 ± 0.01                       | 8.8 ± 0.1    | 8.2 ± 0.1    | 7.2 ± 0.1    | 122.4 ± 3.9           | 71.4 ± 1.9           | 9.6 ± 2.0                                       |
| 17           | 0.21 ± 0.01                       | 0.22 ± 0.01                       | 0.24 ± 0.01                       | 10.1 ± 0.2   | 9.0 ± 0.3    | 8.3 ± 0.2    | 107.3 ± 3.0           | 68.9 ± 1.3           | 8.9 ± 1.4                                       |
| 18           | 0.30 ± 0.01                       | 0.28 ± 0.01                       | 0.33 ± 0.01                       | 9.5 ± 0.2    | 7.9 ± 0.2    | 7.9 ± 0.2    | 146.5 ± 3.7           | 67.9 ± 1.3           | 15.4 ± 1.9                                      |
| 19           | 0.27 ± 0.02                       | 0.25 ± 0.01                       | 0.30 ± 0.02                       | 9.8 ± 0.4    | 8.5 ± 0.3    | 8.3 ± 0.4    | 131.5 ± 7.2           | 67.2 ± 0.8           | 15.7 ± 3.9                                      |
| 20           | 0.30 ± 0.01                       | 0.26 ± 0.01                       | 0.31 ± 0.01                       | 7.9 ± 0.2    | 6.3 ± 0.1    | 6.2 ± 0.1    | 136.9 ± 2.4           | 64.9 ± 0.6           | 6.9 ± 1.3                                       |
| 21           | 0.29 ± 0.01                       | 0.28 ± 0.01                       | 0.32 ± 0.01                       | 8.9 ± 0.4    | 7.7 ± 0.4    | 7.4 ± 0.4    | 142.3 ± 5.2           | 67.2 ± 1.5           | 8.4 ± 1.4                                       |
| 22           | 0.34 ± 0.01                       | 0.32 ± 0.01                       | 0.37 ± 0.01                       | 9.1 ± 0.1    | 7.4 ± 0.1    | 7.2 ± 0.2    | 165.9 ± 1.9           | 67.6 ± 1.1           | 12.3 ± 1.6                                      |
| <b>13 mm</b> |                                   |                                   |                                   |              |              |              |                       |                      |                                                 |
| 3            | 0.27 ± 0.02                       | 0.26 ± 0.02                       | 0.26 ± 0.02                       | 12.4 ± 0.5   | 12.0 ± 0.4   | 9.8 ± 0.4    | 123.6 ± 9.0           | 64.1 ± 1.3           | 8.9 ± 2.1                                       |
| 13           | 0.40 ± 0.02                       | 0.41 ± 0.02                       | 0.36 ± 0.01                       | 12.1 ± 0.2   | 10.4 ± 0.2   | 8.4 ± 0.1    | 183.6 ± 7.0           | 62.4 ± 3.2           | 13.3 ± 2.9                                      |
| 14           | 0.27 ± 0.01                       | 0.30 ± 0.01                       | 0.30 ± 0.01                       | 12.0 ± 0.3   | 10.7 ± 0.3   | 9.4 ± 0.3    | 142.4 ± 3.9           | 70.7 ± 1.1           | 10.1 ± 1.89                                     |
| 15           | 0.34 ± 0.02                       | 0.33 ± 0.01                       | 0.32 ± 0.01                       | 10.1 ± 0.4   | 9.7 ± 0.3    | 7.5 ± 0.3    | 155.5 ± 3.3           | 63.9 ± 1.6           | 15.9 ± 2.9                                      |
| 16           | 0.19 ± 0.01                       | 0.22 ± 0.01                       | 0.23 ± 0.01                       | 10.0 ± 0.5   | 10.0 ± 0.4   | 8.1 ± 0.5    | 104.9 ± 4.5           | 71.4 ± 1.7           | 11.8 ± 3.1                                      |
| 17           | 0.18 ± 0.01                       | 0.17 ± 0.01                       | 0.19 ± 0.01                       | 11.2 ± 0.3   | 9.4 ± 0.2    | 9.1 ± 0.3    | 83.4 ± 2.5            | 66.4 ± 1.6           | 9.9 ± 1.1                                       |
| 18           | 0.30 ± 0.01                       | 0.28 ± 0.01                       | 0.31 ± 0.01                       | 12.5 ± 0.2   | 10.0 ± 0.2   | 9.8 ± 0.2    | 141.5 ± 4.9           | 66.2 ± 1.2           | 20.4 ± 3.4                                      |
| 19           | 0.29 ± 0.03                       | 0.27 ± 0.02                       | 0.30 ± 0.02                       | 12.9 ± 0.7   | 10.6 ± 0.7   | 10.5 ± 0.7   | 137.7 ± 11.1          | 65.1 ± 1.8           | 33.4 ± 3.5                                      |
| 20           | 0.29 ± 0.01                       | 0.25 ± 0.01                       | 0.29 ± 0.01                       | 10.4 ± 0.3   | 8.1 ± 0.2    | 8.0 ± 0.2    | 131.0 ± 2.5           | 63.6 ± 0.7           | 9.6 ± 2.0                                       |
| 21           | 0.30 ± 0.01                       | 0.29 ± 0.01                       | 0.30 ± 0.01                       | 10.8 ± 0.4   | 9.5 ± 0.4    | 8.5 ± 0.3    | 140.3 ± 3.2           | 64.5 ± 1.8           | 14.6 ± 3.0                                      |
| 22           | 0.34 ± 0.01                       | 0.34 ± 0.01                       | 0.35 ± 0.01                       | 12.4 ± 0.6   | 10.6 ± 0.5   | 9.3 ± 0.5    | 165.7 ± 3.4           | 66.4 ± 0.9           | 17.1 ± 2.7                                      |

Means and standard deviations recorded with a source detector separation of 25 mm for the entire healthy population (n = 22) and one of 13 mm for a subset (n = 11) of the study population. Shown are the absorption coefficients  $\mu_a$  and reduced scattering coefficients  $\mu_s'$  per wavelength as well as total hemoglobin concentrations (THC), oxygen saturations (StO<sub>2</sub>) and blood flow indices (BFI).
