# Supplementary material for: Diffuse Optical Characterization of the Healthy Human Thyroid Tissue and Two Pathological Case Studies
Source: PubMed Central journal article supplement (PMC4731400; doi:10.1371/journal.pone.0147851), 2016-01-27
Supplement: pone.0147851.s003.pdf [file pone.0147851.s003.pdf]

Table 1: **S3 Table. Gland location 2 data (25 mm).**

| ID           | $\mu_a, 690$ [ $\text{cm}^{-1}$ ] | $\mu_a, 785$ [ $\text{cm}^{-1}$ ] | $\mu_a, 830$ [ $\text{cm}^{-1}$ ] | $\mu_s, 690$ | $\mu_s, 785$ | $\mu_s, 830$ | THC [ $\mu\text{M}$ ] | StO <sub>2</sub> [%] | BFI [ $\text{cm}^2/\text{s}$ ] $\times 10^{-9}$ |
|--------------|-----------------------------------|-----------------------------------|-----------------------------------|--------------|--------------|--------------|-----------------------|----------------------|-------------------------------------------------|
| <b>25 mm</b> |                                   |                                   |                                   |              |              |              |                       |                      |                                                 |
| 1            | 0.26 ± 0.01                       | 0.25 ± 0.01                       | 0.27 ± 0.02                       | 9.6 ± 0.4    | 8.8 ± 0.4    | 7.7 ± 0.4    | 123.0 ± 8.8           | 65.2 ± 1.8           | 12.7 ± 2.2                                      |
| 2            | 0.28 ± 0.03                       | 0.28 ± 0.02                       | 0.32 ± 0.03                       | 8.9 ± 0.6    | 8.0 ± 0.4    | 7.6 ± 0.6    | 142.6 ± 12.7          | 68.6 ± 2.9           | 14.8 ± 4.9                                      |
| 3            | 0.26 ± 0.03                       | 0.25 ± 0.03                       | 0.28 ± 0.03                       | 8.6 ± 0.4    | 8.0 ± 0.4    | 7.0 ± 0.4    | 125.8 ± 14.8          | 67.1 ± 1.3           | 16.1 ± 4.8                                      |
| 4            | 0.29 ± 0.01                       | 0.29 ± 0.01                       | 0.34 ± 0.01                       | 9.1 ± 0.1    | 8.3 ± 0.2    | 8.0 ± 0.3    | 151.0 ± 5.2           | 69.9 ± 3.2           | 14.7 ± 3.6                                      |
| 5            | 0.29 ± 0.01                       | 0.28 ± 0.01                       | 0.32 ± 0.01                       | 8.6 ± 0.5    | 7.4 ± 0.3    | 6.6 ± 0.2    | 142.8 ± 3.4           | 68.3 ± 2.7           | 11.3 ± 2.1                                      |
| 6            | 0.29 ± 0.01                       | 0.30 ± 0.01                       | 0.36 ± 0.03                       | 7.7 ± 0.3    | 6.3 ± 0.2    | 5.7 ± 0.5    | 157.8 ± 8.8           | 71.8 ± 2.0           | 21.0 ± 4.5                                      |
| 7            | 0.18 ± 0.01                       | 0.19 ± 0.01                       | 0.20 ± 0.01                       | 10.3 ± 0.1   | 9.9 ± 0.2    | 8.9 ± 0.1    | 88.0 ± 3.5            | 66.3 ± 0.9           | 7.2 ± 1.8                                       |
| 8            | 0.33 ± 0.02                       | 0.29 ± 0.01                       | 0.34 ± 0.01                       | 8.5 ± 0.3    | 6.7 ± 0.2    | 6.2 ± 0.2    | 152.2 ± 3.4           | 64.8 ± 2.7           | 13.8 ± 1.5                                      |
| 9            | 0.25 ± 0.02                       | 0.24 ± 0.01                       | 0.26 ± 0.01                       | 7.8 ± 0.3    | 6.9 ± 0.4    | 6.2 ± 0.3    | 117.4 ± 4.0           | 66.1 ± 2.3           | 20.8 ± 6.4                                      |
| 10           | 0.25 ± 0.03                       | 0.26 ± 0.02                       | 0.30 ± 0.04                       | 6.2 ± 0.1    | 5.2 ± 0.1    | 4.9 ± 0.2    | 133.6 ± 15.6          | 71.7 ± 1.1           | 36.1 ± 8.0                                      |
| 11           | 0.29 ± 0.01                       | 0.27 ± 0.01                       | 0.32 ± 0.01                       | 7.4 ± 0.4    | 5.9 ± 0.3    | 5.7 ± 0.3    | 140.2 ± 3.3           | 66.3 ± 1.7           | 11.7 ± 1.7                                      |
| 12           | 0.29 ± 0.02                       | 0.26 ± 0.01                       | 0.32 ± 0.01                       | 6.2 ± 0.1    | 4.8 ± 0.1    | 4.9 ± 0.1    | 140.5 ± 3.4           | 68.3 ± 2.3           | 29.3 ± 9.9                                      |
| 13           | 0.33 ± 0.03                       | 0.29 ± 0.01                       | 0.34 ± 0.01                       | 8.0 ± 0.3    | 6.4 ± 0.2    | 6.3 ± 0.2    | 151.7 ± 4.4           | 65.4 ± 3.3           | 21.4 ± 5.5                                      |
| 14           | 0.26 ± 0.01                       | 0.26 ± 0.01                       | 0.31 ± 0.02                       | 7.6 ± 0.1    | 6.3 ± 0.1    | 6.2 ± 0.2    | 138.2 ± 7.7           | 70.6 ± 1.5           | 16.2 ± 2.4                                      |
| 15           | 0.29 ± 0.02                       | 0.28 ± 0.02                       | 0.32 ± 0.02                       | 7.3 ± 0.7    | 6.4 ± 0.6    | 5.7 ± 0.5    | 143.2 ± 10.2          | 67.5 ± 2.3           | 16.9 ± 3.4                                      |
| 16           | 0.24 ± 0.01                       | 0.25 ± 0.01                       | 0.28 ± 0.01                       | 7.4 ± 0.1    | 6.7 ± 0.1    | 5.9 ± 0.1    | 124.2 ± 2.1           | 70.6 ± 1.1           | 10.8 ± 1.3                                      |
| 17           | 0.20 ± 0.01                       | 0.21 ± 0.01                       | 0.23 ± 0.01                       | 9.7 ± 0.5    | 8.5 ± 0.5    | 7.9 ± 0.5    | 102.7 ± 4.0           | 69.9 ± 0.9           | 10.8 ± 1.9                                      |
| 18           | 0.27 ± 0.01                       | 0.26 ± 0.01                       | 0.30 ± 0.01                       | 9.9 ± 0.4    | 8.6 ± 0.4    | 8.3 ± 0.3    | 132.7 ± 3.3           | 68.3 ± 1.7           | 10.0 ± 1.8                                      |
| 19           | 0.21 ± 0.01                       | 0.21 ± 0.01                       | 0.23 ± 0.02                       | 10.0 ± 0.3   | 8.9 ± 0.4    | 8.4 ± 0.3    | 103.1 ± 9.5           | 66.6 ± 1.6           | 12.9 ± 1.8                                      |
| 20           | 0.28 ± 0.01                       | 0.25 ± 0.01                       | 0.29 ± 0.01                       | 8.1 ± 0.1    | 6.6 ± 0.2    | 6.5 ± 0.2    | 129.1 ± 4.7           | 64.8 ± 1.0           | 7.1 ± 0.9                                       |
| 21           | 0.26 ± 0.02                       | 0.26 ± 0.01                       | 0.30 ± 0.01                       | 8.1 ± 0.1    | 7.1 ± 0.1    | 6.8 ± 0.1    | 132.4 ± 7.3           | 69.3 ± 1.0           | 11.8 ± 2.7                                      |
| 22           | 0.33 ± 0.01                       | 0.31 ± 0.01                       | 0.36 ± 0.01                       | 8.8 ± 0.4    | 7.1 ± 0.3    | 6.8 ± 0.5    | 163.7 ± 4.5           | 67.5 ± 1.5           | 11.6 ± 1.7                                      |
| <b>13 mm</b> |                                   |                                   |                                   |              |              |              |                       |                      |                                                 |
| 3            | 0.29 ± 0.01                       | 0.28 ± 0.01                       | 0.29 ± 0.01                       | 11.1 ± 0.1   | 10.8 ± 0.2   | 8.7 ± 0.1    | 135.1 ± 5.6           | 64.9 ± 1.7           | 12.5 ± 1.7                                      |
| 13           | 0.35 ± 0.02                       | 0.33 ± 0.01                       | 0.32 ± 0.01                       | 12.4 ± 0.3   | 10.5 ± 0.4   | 9.1 ± 0.3    | 156.3 ± 3.8           | 62.4 ± 2.0           | 12.8 ± 3.3                                      |
| 14           | 0.28 ± 0.01                       | 0.30 ± 0.01                       | 0.30 ± 0.01                       | 11.9 ± 0.3   | 10.6 ± 0.2   | 9.3 ± 0.3    | 142.6 ± 3.5           | 68.1 ± 1.2           | 8.1 ± 1.0                                       |
| 15           | 0.35 ± 0.03                       | 0.35 ± 0.02                       | 0.34 ± 0.02                       | 9.5 ± 0.5    | 9.0 ± 0.4    | 6.9 ± 0.3    | 165.5 ± 8.1           | 64.7 ± 2.9           | 19.1 ± 2.5                                      |
| 16           | 0.21 ± 0.01                       | 0.24 ± 0.01                       | 0.25 ± 0.01                       | 8.4 ± 0.3    | 8.4 ± 0.2    | 6.6 ± 0.3    | 112.9 ± 2.8           | 70.1 ± 1.4           | 11.1 ± 1.3                                      |
| 17           | 0.19 ± 0.01                       | 0.19 ± 0.01                       | 0.22 ± 0.01                       | 10.9 ± 0.9   | 9.1 ± 0.8    | 8.8 ± 0.8    | 93.3 ± 4.1            | 68.5 ± 1.5           | 12.8 ± 1.7                                      |
| 18           | 0.29 ± 0.01                       | 0.27 ± 0.01                       | 0.30 ± 0.01                       | 12.8 ± 0.2   | 10.4 ± 0.1   | 10.2 ± 0.2   | 134.5 ± 3.4           | 65.6 ± 1.4           | 13.9 ± 1.8                                      |
| 19           | 0.25 ± 0.01                       | 0.24 ± 0.01                       | 0.26 ± 0.01                       | 12.1 ± 0.3   | 10.2 ± 0.2   | 10.0 ± 0.2   | 118.2 ± 4.7           | 64.6 ± 2.3           | 23.3 ± 3.5                                      |
| 20           | 0.28 ± 0.01                       | 0.25 ± 0.01                       | 0.28 ± 0.01                       | 11.4 ± 0.3   | 8.9 ± 0.2    | 8.8 ± 0.2    | 124.7 ± 1.7           | 62.4 ± 1.7           | 8.6 ± 1.0                                       |
| 21           | 0.27 ± 0.01                       | 0.27 ± 0.01                       | 0.29 ± 0.01                       | 9.8 ± 0.3    | 8.6 ± 0.3    | 7.8 ± 0.3    | 130.8 ± 3.1           | 66.5 ± 1.8           | 21.1 ± 7.2                                      |
| 22           | 0.35 ± 0.01                       | 0.34 ± 0.01                       | 0.36 ± 0.01                       | 11.6 ± 0.7   | 9.8 ± 0.7    | 8.6 ± 0.6    | 168.0 ± 4.3           | 66.0 ± 1.5           | 17.3 ± 2.0                                      |

Means and standard deviations recorded with a source detector separation of 25 mm for the entire healthy population (n = 22) and one of 13 mm for a subset (n = 11) of the study population. Shown are the absorption coefficients  $\mu_a$  and reduced scattering coefficients  $\mu_s'$  per wavelength as well as total hemoglobin concentrations (THC), oxygen saturations (StO<sub>2</sub>) and blood flow indices (BFI).
