# Supplementary material for: Diffuse Optical Characterization of the Healthy Human Thyroid Tissue and Two Pathological Case Studies
Source: PubMed Central journal article supplement (PMC4731400; doi:10.1371/journal.pone.0147851), 2016-01-27
Supplement: pone.0147851.s004.pdf [file pone.0147851.s004.pdf]

Table 1: **S4 Table. Pathology case 1 (CASE 1).**

|                          | <b>THC</b> [ $\mu\text{M}$ ]       | <b>StO<sub>2</sub></b> [%]       | <b>BFI</b> [ $\text{cm}^2/\text{s}$ ] $\times 10^{-9}$ | $\mu_{s,785}$ [ $\text{cm}^{-1}$ ] |
|--------------------------|------------------------------------|----------------------------------|--------------------------------------------------------|------------------------------------|
| Muscle (right)           | 82.6 $\pm$ 0.8                     | 71.9 $\pm$ 1.2                   | 7.2 $\pm$ 0.2                                          | 7.5 $\pm$ 0.1                      |
| Gland location 1 (right) | 138.5 $\pm$ 1.6                    | 74.1 $\pm$ 0.5                   | 12.9 $\pm$ 1.2                                         | 5.9 $\pm$ 0.1                      |
| Gland location 2 (right) | 134.7 $\pm$ 1.2                    | 70.2 $\pm$ 0.5                   | 12.9 $\pm$ 1.1                                         | 5.2 $\pm$ 0.1                      |
| Gland location 2 (left)* | <b>201.3 <math>\pm</math> 3.7</b>  | <b>72.9 <math>\pm</math> 2.2</b> | <b>33.1 <math>\pm</math> 3.4</b>                       | <b>5.7 <math>\pm</math> 0.3</b>    |
| Gland location 1 (left)* | <b>221.2 <math>\pm</math> 11.4</b> | <b>71.6 <math>\pm</math> 3.3</b> | <b>62.8 <math>\pm</math> 6.4</b>                       | <b>5.5 <math>\pm</math> 0.1</b>    |
| Muscle (left)            | 92.7 $\pm$ 1.5                     | 66.1 $\pm$ 3.3                   | 17.9 $\pm$ 4.1                                         | 7.7 $\pm$ 0.3                      |
| Gland center (right)     | 141.8 $\pm$ 2.4                    | 71.8 $\pm$ 2.8                   | 12.5 $\pm$ 0.5                                         | 5.9 $\pm$ 0.2                      |
| Gland center (left)*     | <b>210.0 <math>\pm</math> 6.1</b>  | <b>71.6 <math>\pm</math> 0.8</b> | <b>40.6 <math>\pm</math> 3.0</b>                       | <b>5.7 <math>\pm</math> 0.1</b>    |

Total hemoglobin concentration (THC), oxygen saturation (StO<sub>2</sub>), blood flow index (BFI) and the reduced scattering coefficient ( $\mu_{s'}$ ) for all eight measurement locations according to the study protocol for this patient. Values are means and according standard deviations of several probe placements. \* denotes the nodule locations
