# Supplementary material for: Diffuse Optical Characterization of the Healthy Human Thyroid Tissue and Two Pathological Case Studies
Source: PubMed Central journal article supplement (PMC4731400; doi:10.1371/journal.pone.0147851), 2016-01-27
Supplement: pone.0147851.s005.pdf [file pone.0147851.s005.pdf]

Table 1: **S5 Table. Pathology case 2 (CASE 2).**

|                                  | <b>THC</b> [ $\mu\text{M}$ ]      | <b>StO<sub>2</sub></b> [%]       | <b>BFI</b> [ $\text{cm}^2/\text{s}$ ] $\times 10^{-9}$ | $\mu_{s,785}$ [ $\text{cm}^{-1}$ ] |
|----------------------------------|-----------------------------------|----------------------------------|--------------------------------------------------------|------------------------------------|
| <b>Muscle (right)</b>            | 108.3 $\pm$ 0.8                   | 61.0 $\pm$ 1.1                   | 7.5 $\pm$ 0.6                                          | 5.8 $\pm$ 0.2                      |
| <b>Gland location 1 (right)</b>  | 140.2 $\pm$ 2.9                   | 66.2 $\pm$ 1.3                   | 12.1 $\pm$ 1.3                                         | 7.9 $\pm$ 0.2                      |
| <b>Gland location 2 (right)*</b> | <b>191.8 <math>\pm</math> 1.5</b> | <b>64.7 <math>\pm</math> 2.2</b> | <b>11.2 <math>\pm</math> 1.8</b>                       | <b>6.5 <math>\pm</math> 0.2</b>    |
| <b>Gland location 2 (left)</b>   | 141.8 $\pm$ 0.0                   | 72.5 $\pm$ 0.0                   | 15.0 $\pm$ 1.8                                         | 4.0 $\pm$ 0.1                      |
| <b>Gland location 1 (left)</b>   | 164.1 $\pm$ 2.5                   | 69.2 $\pm$ 0.5                   | 8.7 $\pm$ 0.5                                          | 6.8 $\pm$ 0.1                      |
| <b>Muscle (left)</b>             | 117.1 $\pm$ 1.2                   | 68.0 $\pm$ 1.6                   | 8.5 $\pm$ 1.1                                          | 7.9 $\pm$ 0.1                      |
| <b>Gland center (right)*</b>     | <b>226.5 <math>\pm</math> 8.2</b> | <b>66.9 <math>\pm</math> 0.5</b> | <b>37.6 <math>\pm</math> 3.8</b>                       | <b>6.9 <math>\pm</math> 0.4</b>    |

Total hemoglobin concentration (THC), oxygen saturation (StO<sub>2</sub>), blood flow index (BFI) and the reduced scattering coefficient ( $\mu_{s'}$ ) for all eight measurement locations according to the study protocol for this patient. Values are means and according standard deviations of several probe placements. \* denotes the nodule locations
